# Supplementary material
Source: publisher figshare collection journal article supplement (https://aacr.figshare.com/articles/dataset/_/22787584)
Supplement: Supplementary file 1 [file 40496215]

**Table S4. <sup>68</sup>Ga-N188 normal-organ absorbed doses in male (μGy/MBq, mean ± SD)**

| <b>Organs</b>                       | <b>Absorbed Dose (mean, μGy/MBq)</b> | <b>SD</b> |
|-------------------------------------|--------------------------------------|-----------|
| <b>Adrenals</b>                     | 6.17                                 | 1.40      |
| <b>Brain</b>                        | 0.78                                 | 0.60      |
| <b>Esophagus</b>                    | 2.68                                 | 1.11      |
| <b>Eyes</b>                         | 0.96                                 | 1.01      |
| <b>Gallbladder Wall</b>             | 2.92                                 | 1.12      |
| <b>Left colon</b>                   | 1.97                                 | 1.09      |
| <b>Small Intestine</b>              | 1.84                                 | 1.07      |
| <b>Stomach Wall</b>                 | 9.70                                 | 5.37      |
| <b>Right colon</b>                  | 1.79                                 | 1.10      |
| <b>Rectum</b>                       | 2.31                                 | 1.02      |
| <b>Heart Wall</b>                   | 22.5                                 | 1.86      |
| <b>Kidneys</b>                      | 46.5                                 | 10.2      |
| <b>Liver</b>                        | 7.87                                 | 0.68      |
| <b>Lungs</b>                        | 10.4                                 | 3.57      |
| <b>Pancreas</b>                     | 3.86                                 | 0.6       |
| <b>Prostate</b>                     | 2.86                                 | 1.17      |
| <b>Salivary Glands</b>              | 1.06                                 | 1.09      |
| <b>Red Marrow</b>                   | 1.57                                 | 0.79      |
| <b>Osteogenic Cells</b>             | 1.21                                 | 0.79      |
| <b>Spleen</b>                       | 19.6                                 | 3.81      |
| <b>Testes</b>                       | 1.38                                 | 0.95      |
| <b>Thymus</b>                       | 2.76                                 | 1.17      |
| <b>Thyroid</b>                      | 8.34                                 | 7.36      |
| <b>Urinary Bladder Wall</b>         | 62.3                                 | 46.3      |
| <b>Total Body</b>                   | 2.44                                 | 0.98      |
| <b>Effective Dose<br/>(μSv/MBq)</b> | 7.17                                 | 1.08      |
